# Supplementary material for: Bacterioplankton Diversity and Distribution in Relation to Phytoplankton Community Structure in the Ross Sea Surface Waters
Source: Front Microbiol. 2022 Jan 27;13:722900. doi: 10.3389/fmicb.2022.722900 (PMC8828583; doi:10.3389/fmicb.2022.722900)
Supplement: Supplementary file 1 [file Data_Sheet_1.pdf]

## Supplementary Material

### 1 Supplementary Figures and Tables

#### 1.1 Supplementary Figures

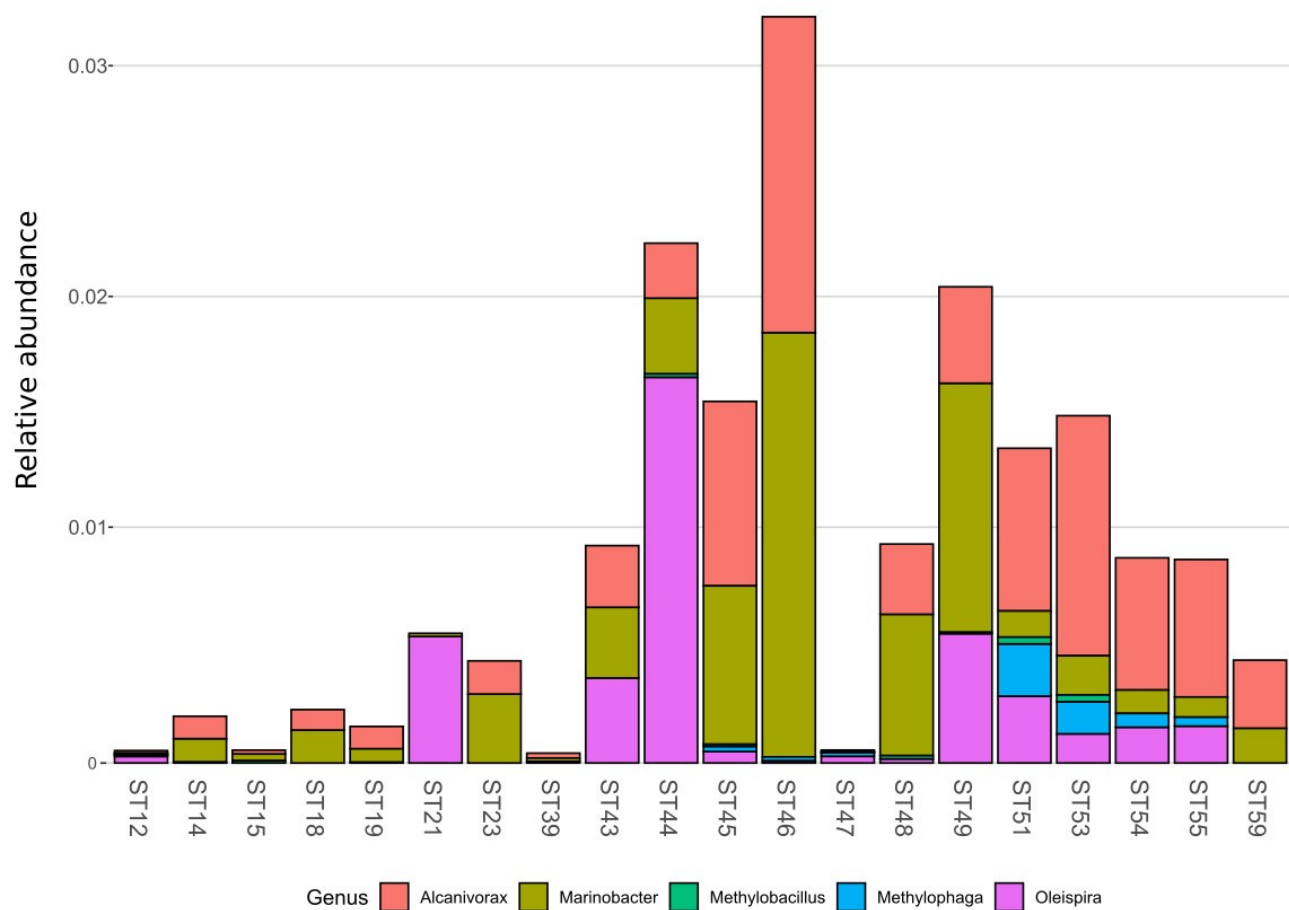

**Supplementary Figure 1.** Genus level distribution 16S rRNA diversity of the putative hydrocarbon degraders detected in the sampled stations.

# Supplementary Material

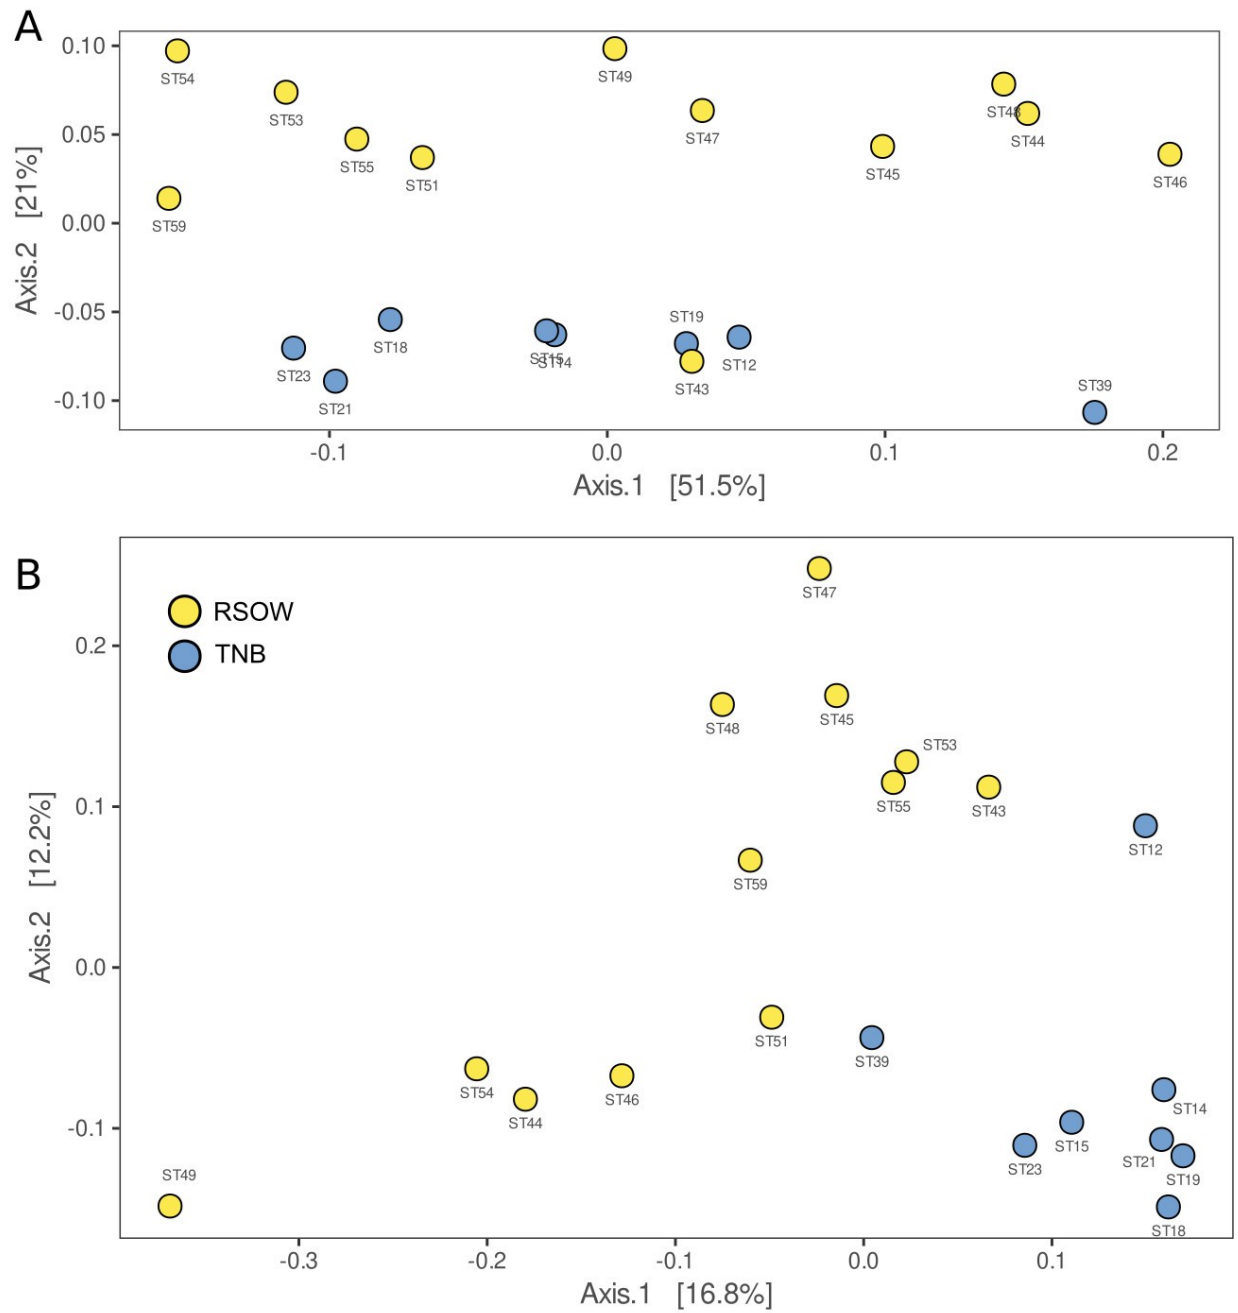

**Supplementary Figure 2.** Principal coordinate analysis (PCoA) plot of the 16S rRNA gene microbial diversity based on Unifrac dissimilarity measure in the sampled stations: A) abundance weighted; and B) unweighted PCoA plots. The amount of variance explained by each axis is reported within square brackets.

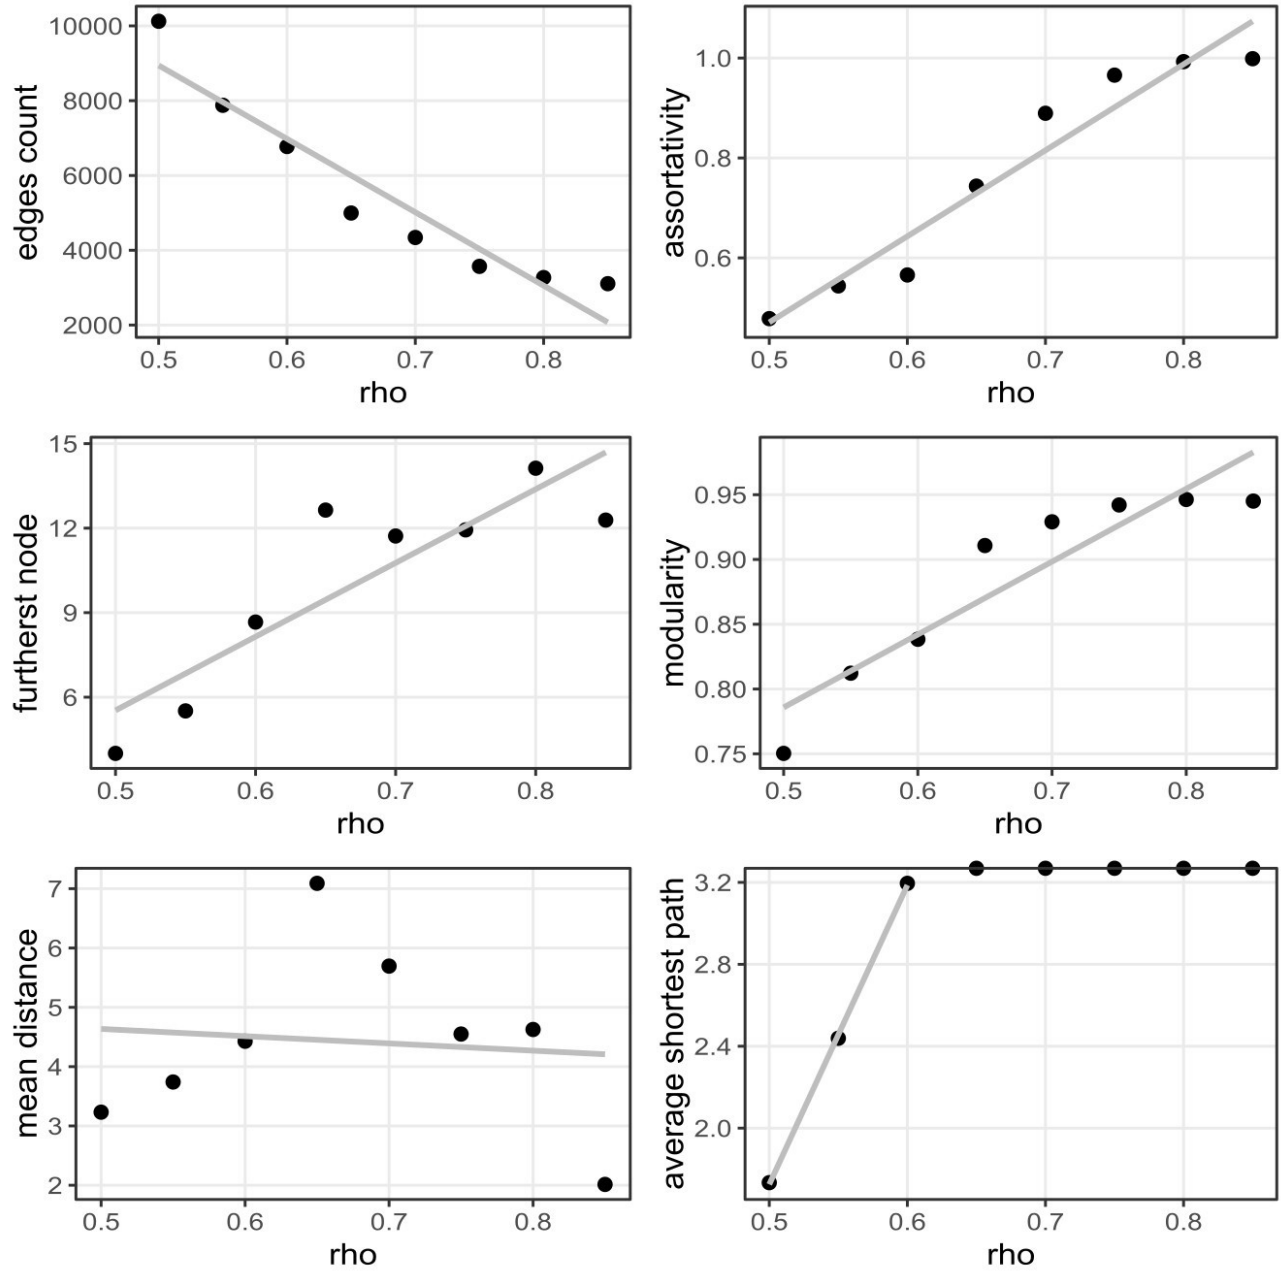

**Supplementary Figure 3.** Changes in network statistics as a function of increasing correlation thresholds. A linear model was fitted to the data (grey line). A clear change in network properties is present for correlation thresholds  $\geq 0.60$ .

## 1.2 Supplementary Tables

**Supplementary Table 1.** Network statistics for increasing correlation thresholds. SPL - Shortest path length.

| Correlation threshold ( $\rho$ ) | Edges count | Average SPL | Assortativity | Furthest node distance | Modularity (Louvain) | Mean distance |
|----------------------------------|-------------|-------------|---------------|------------------------|----------------------|---------------|
| 0.5                              | 10,124      | 1.73        | 0.48          | 4                      | 0.75                 | 3.23          |
| 0.55                             | 7,877       | 2.44        | 0.54          | 5.51                   | 0.81                 | 3.74          |
| 0.6                              | 6,775       | 3.2         | 0.57          | 8.67                   | 0.84                 | 4.43          |
| 0.65                             | 4,996       | Inf         | 0.74          | 12.64                  | 0.91                 | 7.09          |
| 0.7                              | 4,342       | Inf         | 0.89          | 11.72                  | 0.93                 | 5.69          |
| 0.75                             | 3,570       | Inf         | 0.97          | 11.94                  | 0.94                 | 4.55          |
| 0.8                              | 3,270       | Inf         | 0.99          | 14.13                  | 0.95                 | 4.63          |
| 0.85                             | 3,107       | Inf         | 1             | 12.29                  | 0.95                 | 2.01          |
